**S2 Table. General description of the surveyed population.** The acronyms used in this table stand for: No. - Number of participants; M - male; F - female; Elem. - Elementary; H-S - High-school; Tech. - Technical; and Uni. - University. In some cities, sex ratios and/or education levels do not sum to 100% as some participants failed to provide this information.

| City     | No. | Age (in years) |      |       | Sex ratio |       | Education level |       |       |       |
|----------|-----|----------------|------|-------|-----------|-------|-----------------|-------|-------|-------|
|          |     | Average        | S.D. | Range | M         | F     | Elem.           | H-S   | Tech. | Uni.  |
| Tumbes   | 178 | 45.7           | 14.4 | 19-89 | 53.5%     | 43.5% | 12.5%           | 45.5% | 22.5% | 18.5% |
| Piura    | 201 | 40.5           | 12.6 | 20-74 | 45.5%     | 53.5% | 3.5%            | 44.0% | 17.5% | 35.0% |
| Chiclayo | 199 | 40.2           | 13.7 | 19-72 | 34.2%     | 64.3% | 4.0%            | 20.1% | 36.7% | 37.7% |
| Trujillo | 204 | 38.0           | 10.9 | 19-78 | 36.2%     | 63.3% | 2.5%            | 8.0%  | 37.2% | 51.3% |
| Chimbote | 200 | 38.0           | 15.3 | 19-83 | 56.4%     | 41.5% | 2.1%            | 20.1% | 26.9% | 50.9% |
| Lima     | 234 | 41.6           | 14.8 | 19-93 | 45.3%     | 50.7% | 7.0%            | 39.3% | 36.3% | 14.4% |
| Pisco    | 201 | 40.4           | 12.4 | 19-76 | 37.8%     | 62.7% | 1.5%            | 21.9% | 24.9% | 50.7% |
| Mollendo | 200 | 35.0           | 13.6 | 19-79 | 42.6%     | 57.4% | 3.7%            | 22.3% | 33.0% | 41.1% |
| Ilo      | 199 | 41.4           | 12.8 | 19-84 | 27.0%     | 72.5% | 3.9%            | 25.0% | 25.0% | 44.1% |
| Tacna    | 188 | 39.3           | 15.0 | 18-79 | 43.8%     | 53.9% | 9.6%            | 25.8% | 25.8% | 40.4% |
