**S3 Table. Shark-related vocabulary (SRV).** Composed by the words mentioned by the surveyed population when asked: *What words come to mind when you hear the word ‘sharks’?*

| Words in Spanish       | Words in English | Category | Sub-category                     | Frequency |
|------------------------|------------------|----------|----------------------------------|-----------|
| Miedo / Temor          | Fear             | Negative | Negative feelings                | 728       |
| Peligroso              | Dangerous        | Negative | Negative traits                  | 547       |
| Grande                 | Big              | Neutral  | Ecology and biological knowledge | 480       |
| Sangre                 | Blood            | Negative | Negative outcomes                | 396       |
| Muerte                 | Death            | Negative | Negative outcomes                | 297       |
| Diente / Dientes       | Teeth            | Neutral  | Ecology and biological knowledge | 194       |
| Mar                    | Sea              | Neutral  | Ecology and biological knowledge | 183       |
| Depredador             | Predator         | Neutral  | Ecology and biological knowledge | 174       |
| Asesino                | Murderer         | Negative | Negative traits                  | 168       |
| Peligro                | Danger           | Negative | Negative feelings                | 164       |
| Terror                 | Terror           | Negative | Negative feelings                | 159       |
| Carnívoro              | Carnivorous      | Neutral  | Ecology and biological knowledge | 124       |
| Salvaje / Feroz        | Fierce           | Negative | Negative traits                  | 109       |
| Película               | Movie            | Neutral  | Miscellany                       | 104       |
| Aletas                 | Fins             | Positive | Commercial benefits              | 95        |
| Pez, Peces , o Pescado | Fish             | Neutral  | Ecology and biological knowledge | 67        |
| Malo                   | Mean             | Negative | Negative traits                  | 67        |
| Alimento/ Comida       | Food             | Positive | Commercial benefits              | 65        |
| Cartílago              | Cartilage        | Positive | Commercial benefits              | 61        |
| Pánico                 | Panic            | Negative | Negative feelings                | 59        |
| Aceite                 | Oil              | Positive | Commercial benefits              | 54        |
| Fuerte                 | Strong           | Positive | Positive traits                  | 49        |
| Agresivo / Agresividad | Aggressive       | Negative | Negative traits                  | 48        |
| Devorador              | Devourer         | Negative | Negative traits                  | 41        |
| Rico / Sabroso         | Tasty            | Positive | Commercial benefits              | 35        |
| Enorme                 | Huge             | Neutral  | Ecology and biological knowledge | 34        |
| Carne                  | Meat             | Positive | Commercial benefits              | 33        |
| Ataque                 | Attack           | Negative | Negative outcomes                | 28        |
| Extinción              | Extinction       | Neutral  | Ecology and biological knowledge | 27        |
| Gigante                | Giant            | Neutral  | Ecology and biological knowledge | 26        |
| Come gente             | Man-eater        | Negative | Negative traits                  | 26        |
| Cazador                | Hunter           | Neutral  | Ecology and biological knowledge | 25        |
| Nutritivo              | Nutritious       | Positive | Commercial benefits              | 23        |
| Agresion               | Aggression       | Negative | Negative outcomes                | 22        |
| Feo                    | Ugly             | Negative | Negative traits                  | 22        |
| Pesca                  | Catch            | Positive | Commercial benefits              | 21        |

**S3 Table. Shark-related vocabulary (SRV). (Continued)**

| <b>Words in Spanish</b>      | <b>Words in English</b> | <b>Category</b> | <b>Sub-category</b>              | <b>Frequency</b> |
|------------------------------|-------------------------|-----------------|----------------------------------|------------------|
| Blanco                       | White                   | Neutral         | Miscellany                       | 21               |
| Animal                       | Animal                  | Neutral         | Ecology and biological knowledge | 20               |
| Mordedura / Mordida / Muerde | Bite                    | Negative        | Negative outcomes                | 20               |
| Escaso                       | Scarce                  | Neutral         | Ecology and biological knowledge | 19               |
| Horror                       | Horror                  | Negative        | Negative feelings                | 17               |
| Susto                        | Scare                   | Negative        | Negative feelings                | 17               |
| Agua cálida                  | Warm water              | Neutral         | Ecology and biological knowledge | 16               |
| Amenaza                      | Threat                  | Negative        | Negative feelings                | 16               |
| Veloz                        | Fast                    | Positive        | Positive traits                  | 16               |
| Medicina                     | Medicine                | Positive        | Commercial benefits              | 14               |
| Azul                         | Blue                    | Neutral         | Miscellany                       | 14               |
| Playa                        | Beach                   | Neutral         | Miscellany                       | 14               |
| Advertencia / Alerta         | Warning                 | Negative        | Negative feelings                | 14               |
| Precaución / Caultela        | Caution                 | Negative        | Negative feelings                | 14               |
| Filete                       | Fillet                  | Positive        | Commercial benefits              | 13               |
| Cuidado / Preocupación       | Concern                 | Negative        | Negative feelings                | 13               |
| Ceviche                      | Ceviche                 | Positive        | Commercial benefits              | 11               |
| Agua                         | Water                   | Neutral         | Ecology and biological knowledge | 11               |
| Ballena                      | Whale                   | Neutral         | Miscellany                       | 11               |
| Imponente                    | Grand                   | Positive        | Positive traits                  | 11               |
| Saludable / Salud            | Healthy                 | Positive        | Commercial benefits              | 10               |
| Especie marina               | Marine                  | Neutral         | Ecology and biological knowledge | 10               |
| Negro                        | Black                   | Neutral         | Ecology and biological knowledge | 10               |
| Tollo                        | Smooth-hound            | Neutral         | Ecology and biological knowledge | 10               |
| Mamífero                     | Mammal                  | Neutral         | Miscellany                       | 10               |
| Bonito                       | Pretty                  | Positive        | Positive traits                  | 10               |
| Comercial                    | Commercial              | Positive        | Commercial benefits              | 9                |
| No común                     | Not common              | Neutral         | Ecology and biological knowledge | 9                |
| Destrucción                  | Destruction             | Negative        | Negative outcomes                | 9                |
| Mata / Matar                 | Kill                    | Negative        | Negative outcomes                | 9                |
| Asombro                      | Awe                     | Positive        | Positive feelings                | 9                |
| Sorprendente                 | Awesome                 | Positive        | Positive feelings                | 9                |
| Dañino                       | Harmful                 | Negative        | Negative traits                  | 8                |
| No comestible                | Non-edible              | Negative        | Negative traits                  | 8                |
| Respeto                      | Respect                 | Positive        | Positive feelings                | 8                |
| Comestible                   | Edible                  | Positive        | Commercial benefits              | 7                |
| Rojo                         | Red                     | Neutral         | Miscellany                       | 7                |
| Voraz                        | Voracious               | Negative        | Negative traits                  | 7                |

**S3 Table. Shark-related vocabulary (SRV). (Continued)**

| <b>Words in Spanish</b>    | <b>Words in English</b> | <b>Category</b> | <b>Sub-category</b>              | <b>Frequency</b> |
|----------------------------|-------------------------|-----------------|----------------------------------|------------------|
| Carroñero                  | Scavenger               | Neutral         | Ecology and biological knowledge | 6                |
| Océano                     | Ocean                   | Neutral         | Ecology and biological knowledge | 6                |
| Escalofrío / Escalofriante | Shivers                 | Negative        | Negative feelings                | 6                |
| Mortal                     | Lethal                  | Negative        | Negative feelings                | 6                |
| Curiosidad                 | Curiosity               | Positive        | Positive feelings                | 6                |
| Astuto                     | Astute                  | Positive        | Positive traits                  | 6                |
| Rápido                     | Quick                   | Positive        | Positive traits                  | 6                |
| Caro                       | Expensive               | Positive        | Commercial benefits              | 5                |
| Colágeno                   | Collagen                | Positive        | Commercial benefits              | 5                |
| Curativo                   | Healing                 | Positive        | Commercial benefits              | 5                |
| Industria                  | Industry                | Positive        | Commercial benefits              | 5                |
| Pastillas                  | Pills                   | Positive        | Commercial benefits              | 5                |
| Altamar                    | High seas               | Neutral         | Ecology and biological knowledge | 5                |
| Nadador                    | Swimmer                 | Neutral         | Ecology and biological knowledge | 5                |
| Arena                      | Sand                    | Neutral         | Miscellany                       | 5                |
| Colmillo                   | Fang                    | Neutral         | Miscellany                       | 5                |
| Profundidad                | Deep                    | Neutral         | Miscellany                       | 5                |
| Tamaño                     | Size                    | Neutral         | Miscellany                       | 5                |
| Velocidad                  | Speed                   | Neutral         | Miscellany                       | 5                |
| Desesperación              | Despair                 | Negative        | Negative feelings                | 5                |
| Fobia                      | Phobia                  | Negative        | Negative feelings                | 5                |
| Emoción                    | Excitement              | Positive        | Positive feelings                | 5                |
| Inteligente                | Intelligent             | Positive        | Positive traits                  | 5                |
| Negocio                    | Business                | Positive        | Commercial benefits              | 4                |
| Acuatico                   | Aquatic                 | Neutral         | Ecology and biological knowledge | 4                |
| Inmenso                    | Immense                 | Neutral         | Ecology and biological knowledge | 4                |
| Raro                       | Rare                    | Neutral         | Ecology and biological knowledge | 4                |
| Atlántico                  | Atlantic                | Neutral         | Miscellany                       | 4                |
| Cachalote                  | Sperm whale             | Neutral         | Miscellany                       | 4                |
| Cetáceo                    | Cetacean                | Neutral         | Miscellany                       | 4                |
| China                      | China                   | Neutral         | Miscellany                       | 4                |
| Come                       | Eats                    | Neutral         | Miscellany                       | 4                |
| Desconocido                | Unknown                 | Neutral         | Miscellany                       | 4                |
| Gordo                      | Fat                     | Neutral         | Miscellany                       | 4                |
| Angustia                   | Anguish                 | Negative        | Negative feelings                | 4                |
| Escapar / Huir             | Escape                  | Negative        | Negative feelings                | 4                |
| Espanto                    | Fright                  | Negative        | Negative feelings                | 4                |
| Nervios                    | Nervousness             | Negative        | Negative feelings                | 4                |
| Pavor                      | Dread                   | Negative        | Negative feelings                | 4                |
| Prevención                 | Prevention              | Negative        | Negative feelings                | 4                |

**S3 Table. Shark-related vocabulary (SRV). (Continued)**

| <b>Words in Spanish</b>     | <b>Words in English</b> | <b>Category</b> | <b>Sub-category</b>              | <b>Frequency</b> |
|-----------------------------|-------------------------|-----------------|----------------------------------|------------------|
| Suspense                    | Suspense                | Negative        | Negative feelings                | 4                |
| Heridas                     | Wounds                  | Negative        | Negative outcomes                | 4                |
| Cruel                       | Cruel                   | Negative        | Negative traits                  | 4                |
| Monstruo                    | Monster                 | Negative        | Negative traits                  | 4                |
| Asombroso                   | Amazing                 | Positive        | Positive feelings                | 4                |
| Hermoso / Belleza           | Beautiful               | Positive        | Positive traits                  | 4                |
| Afrodisiaco                 | Aphrodisiac             | Positive        | Commercial benefits              | 3                |
| Barco                       | Boat                    | Positive        | Commercial benefits              | 3                |
| Delicioso                   | Delicious               | Positive        | Commercial benefits              | 3                |
| Exportación / Exportar      | Export                  | Positive        | Commercial benefits              | 3                |
| Frito                       | Fried                   | Positive        | Commercial benefits              | 3                |
| Harina                      | Meal                    | Positive        | Commercial benefits              | 3                |
| Pescador                    | Fishermen               | Positive        | Commercial benefits              | 3                |
| Turismo                     | Tourism                 | Positive        | Commercial benefits              | 3                |
| Vitamina                    | Vitamin                 | Positive        | Commercial benefits              | 3                |
| Afilado / Filoso / Filudo   | Sharp                   | Neutral         | Ecology and biological knowledge | 3                |
| Agua fria                   | Cold water              | Neutral         | Ecology and biological knowledge | 3                |
| Boca grande                 | Big mouth               | Neutral         | Ecology and biological knowledge | 3                |
| Comunicar                   | Communicate             | Neutral         | Miscellany                       | 3                |
| Delfin                      | Dolphin                 | Neutral         | Miscellany                       | 3                |
| Gris                        | Grey                    | Neutral         | Miscellany                       | 3                |
| Lejanía                     | Remoteness              | Neutral         | Miscellany                       | 3                |
| Orilla                      | Shore                   | Neutral         | Miscellany                       | 3                |
| Poco                        | Low                     | Neutral         | Miscellany                       | 3                |
| Sal                         | Salt                    | Neutral         | Miscellany                       | 3                |
| Correr                      | Run!                    | Negative        | Negative feelings                | 3                |
| Llanto                      | Crying                  | Negative        | Negative feelings                | 3                |
| Riesgo                      | Risk                    | Negative        | Negative feelings                | 3                |
| Accidente                   | Accident                | Negative        | Negative outcomes                | 3                |
| Dolor                       | Pain                    | Negative        | Negative outcomes                | 3                |
| Grito                       | Scream                  | Negative        | Negative outcomes                | 3                |
| Desagradable / No agradable | Unpleasant              | Negative        | Negative traits                  | 3                |
| Horrible                    | Horrible                | Negative        | Negative traits                  | 3                |
| Ofensivo                    | Offensive               | Negative        | Negative traits                  | 3                |
| Rudo                        | Burly                   | Negative        | Negative traits                  | 3                |
| Audaz                       | Bold                    | Positive        | Positive traits                  | 3                |
| Interesante                 | Interesting             | Positive        | Positive traits                  | 3                |
| Arpón                       | Harpoon                 | Positive        | Commercial benefits              | 2                |
| Artesanía                   | Hand craft              | Positive        | Commercial benefits              | 2                |
| Carnoso                     | Fleshy                  | Positive        | Commercial benefits              | 2                |
| Consumo                     | Consumption             | Positive        | Commercial benefits              | 2                |
| Extranjero                  | Foreign market          | Positive        | Commercial benefits              | 2                |
| Fierro                      | Iron                    | Positive        | Commercial benefits              | 2                |

**S3 Table. Shark-related vocabulary (SRV). (Continued)**

| <b>Words in Spanish</b> | <b>Words in English</b> | <b>Category</b> | <b>Sub-category</b>              | <b>Frequency</b> |
|-------------------------|-------------------------|-----------------|----------------------------------|------------------|
| Jugoso                  | Juicy                   | Positive        | Commercial benefits              | 2                |
| Lanchas                 | Fishing vessel          | Positive        | Commercial benefits              | 2                |
| Protéico / Proteína     | Protein                 | Positive        | Commercial benefits              | 2                |
| Red                     | Fishing net             | Positive        | Commercial benefits              | 2                |
| Abundante               | Abundant                | Neutral         | Ecology and biological knowledge | 2                |
| Grasa                   | Grease                  | Neutral         | Ecology and biological knowledge | 2                |
| Grupos                  | Groups                  | Neutral         | Ecology and biological knowledge | 2                |
| Hambriento              | Hungry                  | Neutral         | Ecology and biological knowledge | 2                |
| Largo                   | Long                    | Neutral         | Ecology and biological knowledge | 2                |
| Mandíbula               | Jaw                     | Neutral         | Ecology and biological knowledge | 2                |
| Pequeño                 | Small                   | Neutral         | Ecology and biological knowledge | 2                |
| Pesado                  | Heavy                   | Neutral         | Ecology and biological knowledge | 2                |
| Suave                   | Soft                    | Neutral         | Ecology and biological knowledge | 2                |
| Algas                   | Algae                   | Neutral         | Miscellany                       | 2                |
| Anemia                  | Anemia                  | Neutral         | Miscellany                       | 2                |
| Cine                    | Film                    | Neutral         | Miscellany                       | 2                |
| Diamante                | Diamond                 | Neutral         | Miscellany                       | 2                |
| Exterminación           | Extermination           | Neutral         | Miscellany                       | 2                |
| Inexistente             | Non-existent            | Neutral         | Miscellany                       | 2                |
| Martillo                | Hammer                  | Neutral         | Miscellany                       | 2                |
| Olas                    | Waves                   | Neutral         | Miscellany                       | 2                |
| Verano                  | Summer                  | Neutral         | Miscellany                       | 2                |
| Vivo                    | Alive                   | Neutral         | Miscellany                       | 2                |
| Alejarse                | Distance yourself       | Negative        | Negative feelings                | 2                |
| Auxilio                 | Help!                   | Negative        | Negative feelings                | 2                |
| Colera / Enojo          | Anger                   | Negative        | Negative feelings                | 2                |
| Espantoso               | Frightening             | Negative        | Negative feelings                | 2                |
| Mutilación              | Mutilation              | Negative        | Negative outcomes                | 2                |
| Piernas                 | Legs                    | Negative        | Negative outcomes                | 2                |
| Cochino / Suciedad      | Dirty                   | Negative        | Negative traits                  | 2                |
| Destructor              | Destroyer               | Negative        | Negative traits                  | 2                |
| Insalubre               | Insalubrious            | Negative        | Negative traits                  | 2                |
| Malvado                 | Evil                    | Negative        | Negative traits                  | 2                |
| Tirano                  | Tyrant                  | Negative        | Negative traits                  | 2                |
| Conservación            | Conserve                | Positive        | Positive feelings                | 2                |
| Grandeza                | Greatness               | Positive        | Positive feelings                | 2                |
| Majestuoso              | Majestic                | Positive        | Positive traits                  | 2                |
| Tierno / Tiernos        | Cute                    | Positive        | Positive traits                  | 2                |
| Unico                   | Unique                  | Positive        | Positive traits                  | 2                |

**S3 Table. Shark-related vocabulary (SRV). (Continued)**

| <b>Words in Spanish</b> | <b>Words in English</b> | <b>Category</b> | <b>Sub-category</b>              | <b>Frequency</b> |
|-------------------------|-------------------------|-----------------|----------------------------------|------------------|
| Barato                  | Cheap                   | Positive        | Commercial benefits              | 1                |
| Calcio                  | Calcium                 | Positive        | Commercial benefits              | 1                |
| Comercio                | Commerce                | Positive        | Commercial benefits              | 1                |
| Dinero                  | Money                   | Positive        | Commercial benefits              | 1                |
| Económico               | Economic                | Positive        | Commercial benefits              | 1                |
| Enlatado                | Canned                  | Positive        | Commercial benefits              | 1                |
| Inversión               | Investment              | Positive        | Commercial benefits              | 1                |
| Omega 3                 | Omega 3                 | Positive        | Commercial benefits              | 1                |
| Pesquería               | Fishery                 | Positive        | Commercial benefits              | 1                |
| Polvo                   | Powder                  | Positive        | Commercial benefits              | 1                |
| Precio                  | Price                   | Positive        | Commercial benefits              | 1                |
| Procesado               | Processed               | Positive        | Commercial benefits              | 1                |
| Rendidor                | Productive              | Positive        | Commercial benefits              | 1                |
| Restaurante             | Restaurant              | Positive        | Commercial benefits              | 1                |
| Trabajo                 | Work                    | Positive        | Commercial benefits              | 1                |
| Abundancia              | Abundance               | Neutral         | Ecology and biological knowledge | 1                |
| Aspero                  | Rough                   | Neutral         | Ecology and biological knowledge | 1                |
| Cadena alimenticia      | Food web                | Neutral         | Ecology and biological knowledge | 1                |
| Cardumen                | Schooling               | Neutral         | Ecology and biological knowledge | 1                |
| Ciego                   | Blind                   | Neutral         | Ecology and biological knowledge | 1                |
| Contaminación           | Pollution               | Neutral         | Ecology and biological knowledge | 1                |
| Escamas                 | Scales                  | Neutral         | Ecology and biological knowledge | 1                |
| Escualo                 | Shark                   | Neutral         | Ecology and biological knowledge | 1                |
| Fondo                   | Benthic                 | Neutral         | Ecology and biological knowledge | 1                |
| Liso                    | Smooth                  | Neutral         | Ecology and biological knowledge | 1                |
| Necesario               | Necessary               | Neutral         | Ecology and biological knowledge | 1                |
| Ojasos                  | Big eyes                | Neutral         | Ecology and biological knowledge | 1                |
| Ojos                    | Eyes                    | Neutral         | Ecology and biological knowledge | 1                |
| Piel dura               | Hard skin               | Neutral         | Ecology and biological knowledge | 1                |
| Reciclador              | Recycler                | Neutral         | Ecology and biological knowledge | 1                |
| Solitario               | Solitary                | Neutral         | Ecology and biological knowledge | 1                |

**S3 Table. Shark-related vocabulary (SRV). (Continued)**

| <b>Words in Spanish</b> | <b>Words in English</b> | <b>Category</b> | <b>Sub-category</b>              | <b>Frequency</b> |
|-------------------------|-------------------------|-----------------|----------------------------------|------------------|
| Solo                    | Lonely                  | Neutral         | Ecology and biological knowledge | 1                |
| Toxinas                 | Toxins                  | Neutral         | Ecology and biological knowledge | 1                |
| Variedad                | Diversity               | Neutral         | Ecology and biological knowledge | 1                |
| Vida larga              | Long-lived              | Neutral         | Ecology and biological knowledge | 1                |
| Acción                  | Action                  | Neutral         | Miscellany                       | 1                |
| Agua dulce              | Freshwater              | Neutral         | Miscellany                       | 1                |
| Agudo                   | Acute                   | Neutral         | Miscellany                       | 1                |
| Artritis                | Arthritis               | Neutral         | Miscellany                       | 1                |
| Asia                    | Asia                    | Neutral         | Miscellany                       | 1                |
| Aumenta                 | Increase                | Neutral         | Miscellany                       | 1                |
| Australia               | Australia               | Neutral         | Miscellany                       | 1                |
| Bacalao                 | Cod                     | Neutral         | Miscellany                       | 1                |
| Calentamiento global    | Global warming          | Neutral         | Miscellany                       | 1                |
| Cálido                  | Warm                    | Neutral         | Miscellany                       | 1                |
| Calor                   | Heat                    | Neutral         | Miscellany                       | 1                |
| Cantidad                | Quantity                | Neutral         | Miscellany                       | 1                |
| Caribe                  | Caribbean               | Neutral         | Miscellany                       | 1                |
| Celeste                 | Light blue              | Neutral         | Miscellany                       | 1                |
| Clima                   | Weather                 | Neutral         | Miscellany                       | 1                |
| Contrabando             | Smuggling               | Neutral         | Miscellany                       | 1                |
| Coral                   | Coral                   | Neutral         | Miscellany                       | 1                |
| Cornudo                 | Horns                   | Neutral         | Miscellany                       | 1                |
| Cuchillo                | Knife                   | Neutral         | Miscellany                       | 1                |
| Desmenuzado             | Crumbled                | Neutral         | Miscellany                       | 1                |
| Dorado                  | Golden                  | Neutral         | Miscellany                       | 1                |
| Duro                    | Hard                    | Neutral         | Miscellany                       | 1                |
| EEUU                    | USA                     | Neutral         | Miscellany                       | 1                |
| Espada                  | Sword                   | Neutral         | Miscellany                       | 1                |
| Espinas                 | Spines                  | Neutral         | Miscellany                       | 1                |
| Esquelético             | Skeletal                | Neutral         | Miscellany                       | 1                |
| Extension               | Broad                   | Neutral         | Miscellany                       | 1                |
| Fósiles                 | Fossils                 | Neutral         | Miscellany                       | 1                |
| Gato                    | Cat                     | Neutral         | Miscellany                       | 1                |
| Gente                   | People                  | Neutral         | Miscellany                       | 1                |
| Habilidad               | Skills                  | Neutral         | Miscellany                       | 1                |
| Historietas             | Stories                 | Neutral         | Miscellany                       | 1                |
| Hombre                  | Man                     | Neutral         | Miscellany                       | 1                |
| Huesudo                 | Bony                    | Neutral         | Miscellany                       | 1                |
| Invasión                | Invasion                | Neutral         | Miscellany                       | 1                |
| Japón                   | Japan                   | Neutral         | Miscellany                       | 1                |
| Limitado consumo        | Limited consumption     | Neutral         | Miscellany                       | 1                |
| Lobos marinos           | Sea lions               | Neutral         | Miscellany                       | 1                |
| Mal uso                 | Misuse                  | Neutral         | Miscellany                       | 1                |

**S3 Table. Shark-related vocabulary (SRV). (Continued)**

| <b>Words in Spanish</b> | <b>Words in English</b> | <b>Category</b> | <b>Sub-category</b> | <b>Frequency</b> |
|-------------------------|-------------------------|-----------------|---------------------|------------------|
| Natural                 | Natural                 | Neutral         | Miscellany          | 1                |
| Naturaleza              | Nature                  | Neutral         | Miscellany          | 1                |
| Noche                   | Night                   | Neutral         | Miscellany          | 1                |
| Normal                  | Normal                  | Neutral         | Miscellany          | 1                |
| Nuevo                   | New                     | Neutral         | Miscellany          | 1                |
| Nunca visto             | Never seen              | Neutral         | Miscellany          | 1                |
| Obesidad                | Obesity                 | Neutral         | Miscellany          | 1                |
| Rebelde                 | Rebel                   | Neutral         | Miscellany          | 1                |
| Sin espinas             | Boneless                | Neutral         | Miscellany          | 1                |
| Submarino               | Submarine               | Neutral         | Miscellany          | 1                |
| Tablista                | Surfer                  | Neutral         | Miscellany          | 1                |
| Tragar                  | Swallow                 | Neutral         | Miscellany          | 1                |
| Vida                    | Life                    | Neutral         | Miscellany          | 1                |
| Videos                  | Videos                  | Neutral         | Miscellany          | 1                |
| Volumen                 | Volume                  | Neutral         | Miscellany          | 1                |
| Alarmante               | Alarming                | Negative        | Negative feelings   | 1                |
| Ansiedad                | Anxiety                 | Negative        | Negative feelings   | 1                |
| Arriesgado              | Risky                   | Negative        | Negative feelings   | 1                |
| Asco                    | Disgust                 | Negative        | Negative feelings   | 1                |
| Asqueroso               | Disgusting              | Negative        | Negative feelings   | 1                |
| Asustado                | Scared                  | Negative        | Negative feelings   | 1                |
| Asustar                 | Frighten                | Negative        | Negative feelings   | 1                |
| Atento                  | Alertness               | Negative        | Negative feelings   | 1                |
| Aterrador               | Scary                   | Negative        | Negative feelings   | 1                |
| Decepción               | Disappointment          | Negative        | Negative feelings   | 1                |
| Defensa                 | Defense                 | Negative        | Negative feelings   | 1                |
| Desgracia               | Misfortune              | Negative        | Negative feelings   | 1                |
| Furia                   | Fury                    | Negative        | Negative feelings   | 1                |
| Injusto                 | Unfair                  | Negative        | Negative feelings   | 1                |
| Inseguridad             | Insecurity              | Negative        | Negative feelings   | 1                |
| Lágrimas                | Tears                   | Negative        | Negative feelings   | 1                |
| Pena                    | Sadness                 | Negative        | Negative feelings   | 1                |
| Pesadillas              | Nightmares              | Negative        | Negative feelings   | 1                |
| Piedad                  | Mercy please!           | Negative        | Negative feelings   | 1                |
| Trágico                 | Tragic                  | Negative        | Negative feelings   | 1                |
| Vértigo                 | Vertigo                 | Negative        | Negative feelings   | 1                |
| Amputacion              | Amputation              | Negative        | Negative outcomes   | 1                |
| Desgarro                | Tear                    | Negative        | Negative outcomes   | 1                |
| Enfermedades            | Diseases                | Negative        | Negative outcomes   | 1                |
| Movilizarse             | Displaced               | Negative        | Negative outcomes   | 1                |
| Rompe mallas            | Mesh-breaker            | Negative        | Negative outcomes   | 1                |
| Triturar                | Crush                   | Negative        | Negative outcomes   | 1                |
| Voltea botes            | Turn boats              | Negative        | Negative outcomes   | 1                |
| Amargo                  | Bitter                  | Negative        | Negative traits     | 1                |
| Canibal                 | Cannibal                | Negative        | Negative traits     | 1                |
| Desabrido               | Tasteless               | Negative        | Negative traits     | 1                |
| Desalmado               | Fiend                   | Negative        | Negative traits     | 1                |

**S3 Table. Shark-related vocabulary (SRV). (Continued)**

| <b>Words in Spanish</b> | <b>Words in English</b> | <b>Category</b> | <b>Sub-category</b> | <b>Frequency</b> |
|-------------------------|-------------------------|-----------------|---------------------|------------------|
| Desastrozo              | Disastrous              | Negative        | Negative traits     | 1                |
| Desmesurado             | Excessive               | Negative        | Negative traits     | 1                |
| Despiadado              | Ruthless                | Negative        | Negative traits     | 1                |
| Difícil de pescar       | Hard to fish            | Negative        | Negative traits     | 1                |
| Enemigo                 | Enemy                   | Negative        | Negative traits     | 1                |
| Extrangulador           | Strangler               | Negative        | Negative traits     | 1                |
| Impuro                  | Impure                  | Negative        | Negative traits     | 1                |
| Macabro                 | Macabre                 | Negative        | Negative traits     | 1                |
| Molesto                 | Angry                   | Negative        | Negative traits     | 1                |
| No saludable            | Unhealthy               | Negative        | Negative traits     | 1                |
| Perverso                | Perverse                | Negative        | Negative traits     | 1                |
| Poco amigable           | Not friendly            | Negative        | Negative traits     | 1                |
| Problemático            | Problematic             | Negative        | Negative traits     | 1                |
| Rabioso                 | Mad                     | Negative        | Negative traits     | 1                |
| Sigiloso                | Sneaky                  | Negative        | Negative traits     | 1                |
| Violento                | Violent                 | Negative        | Negative traits     | 1                |
| Admiración              | Admiration              | Positive        | Positive feelings   | 1                |
| Atracción               | Attraction              | Positive        | Positive feelings   | 1                |
| Autoridad               | Authority               | Positive        | Positive feelings   | 1                |
| Divertido               | Fun                     | Positive        | Positive feelings   | 1                |
| Euforia                 | Euphoria                | Positive        | Positive feelings   | 1                |
| Impresivo               | Impressive              | Positive        | Positive feelings   | 1                |
| Libertad                | Freedom                 | Positive        | Positive feelings   | 1                |
| Paz                     | Peace                   | Positive        | Positive feelings   | 1                |
| Poder                   | Power                   | Positive        | Positive feelings   | 1                |
| Agil                    | Agile                   | Positive        | Positive traits     | 1                |
| Bueno                   | Good                    | Positive        | Positive traits     | 1                |
| Chevere                 | Cool                    | Positive        | Positive traits     | 1                |
| Dulce                   | Sweet                   | Positive        | Positive traits     | 1                |
| Especial                | Special                 | Positive        | Positive traits     | 1                |
| Espectacular            | Spectacular             | Positive        | Positive traits     | 1                |
| Extraordinario          | Extraordinary           | Positive        | Positive traits     | 1                |
| Fenomenal               | Phenomenal              | Positive        | Positive traits     | 1                |
| Guardián                | Guardian                | Positive        | Positive traits     | 1                |
| Impresionante           | Spectacular             | Positive        | Positive traits     | 1                |
| Limpieza                | Clean                   | Positive        | Positive traits     | 1                |
| Lindo                   | Nice                    | Positive        | Positive traits     | 1                |
| Listo                   | Smart                   | Positive        | Positive traits     | 1                |
