**S2 Fig. Distribution of ‘tollo’ consumers per city as a function of their frequency of shark meat consumption.** Shark meat consumers were categorized into: Regular consumers (REG), Occasional consumers (OCC), Unusual consumers (UNU) and Former consumers (FOR)

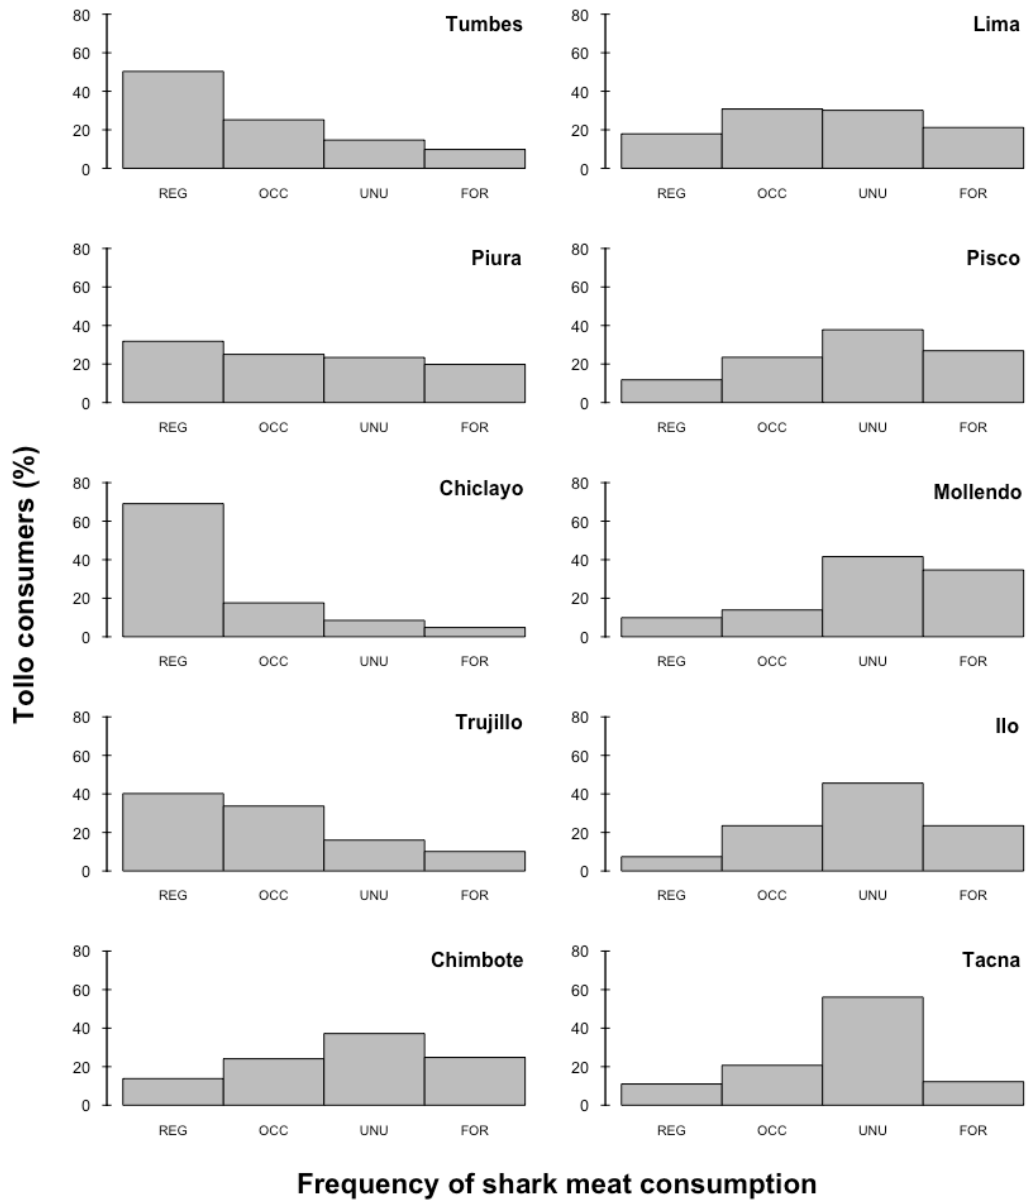

Source: https://storage.googleapis.com/plos-corpus-prod/10.1371/journal.pone.0202971/1/pone.0202971.s006.pdf
