**S3 Fig. Proportion of the surveyed population per city that knows that sharks are present, maybe present, or are not present in Peruvian waters. The proportion of participants that did not answer this question are included in the N/A category.**

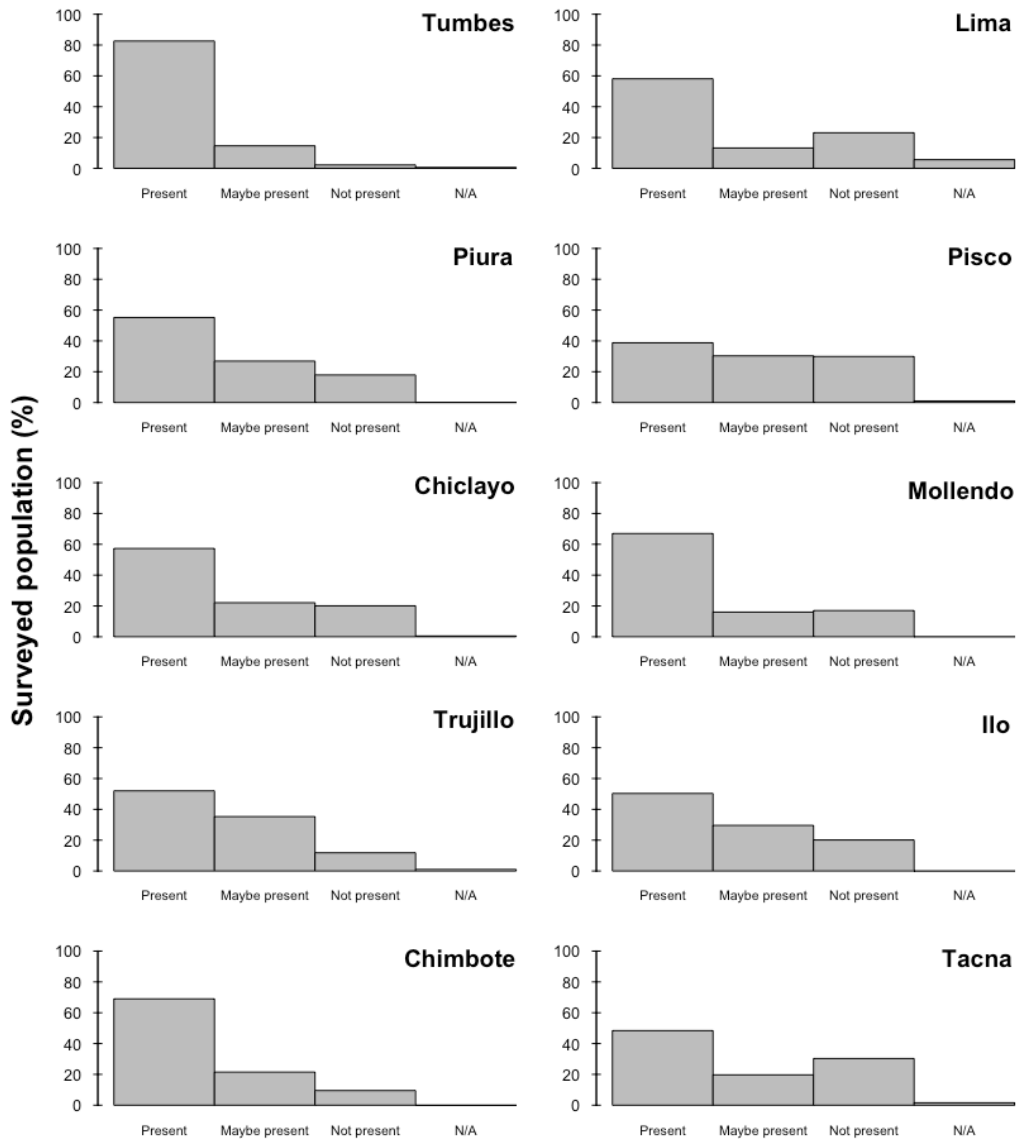

**Sharks presence in Peruvian waters**
