# Supplementary material for: Attitudes and misconceptions towards sharks and shark meat consumption along the Peruvian coast
Source: PLOS journal article supplement (doi:10.1371/journal.pone.0202971), 2018-08-29
Supplement: S1 (10.1371/journal.pone.0202971.s001) [file journal.pone.0202971.s001]

**S1 Table. Structure of questions of the survey.**

| No. | Questions                                                                                                                            | Answer options                                                                                           |
|-----|--------------------------------------------------------------------------------------------------------------------------------------|----------------------------------------------------------------------------------------------------------|
| 1   | Year of birth                                                                                                                        | Open ended question                                                                                      |
| 2   | Gender                                                                                                                               | Male<br>Female<br>Non-binary                                                                             |
| 3   | Place of birth                                                                                                                       | Open ended question                                                                                      |
| 4   | Highest completed level of education                                                                                                 | Elementary<br>High-school<br>Technical<br>University<br>NA                                               |
| 5   | Have you ever eaten 'tollo'?                                                                                                         | Yes<br>No<br>Do not know                                                                                 |
| 6   | With what frequency do you eat 'tollo'?<br><i>Only asked if the participant answered 'Yes' in the previous question</i>              | Once a week<br>Twice a month<br>Once a month<br>Hardly ever<br>Do not recall<br>Used to, but not anymore |
| 7   | Do you believe that sharks are found in Peruvian waters?                                                                             | Yes<br>No<br>Do not know                                                                                 |
| 8   | What species of sharks are found in Peruvian waters?<br><i>Only asked if the participant answered 'Yes' in the previous question</i> | Open ended question                                                                                      |
| 9   | Have you ever eaten sharks?                                                                                                          | Yes<br>No<br>Do not know                                                                                 |
| 10  | What words come to mind when you hear the word 'shark'?                                                                              | Open ended question                                                                                      |
